# Supplementary material for: Bacterial outer membrane vesicle-modified metal–organic frameworks for sonodynamic therapy–immunotherapy of breast cancer
Source: Royal Society of Chemistry journal article supplement (doi:10.1039/d3nj03511e), 2023-11-23
Supplement: d3nj03511e1.pdf [file d3nj03511e1.pdf]

## **Supplementary material**

### **Bacterial outer membrane vesicles-modified metal-organic framework for sonodynamic-immunotherapy of breast cancer**

Ziwen Zhang<sup>1</sup>, Jiawei Tu<sup>2</sup>, Xiufeng Kuang<sup>1</sup>, Mengya Shi<sup>1</sup>, Yumeng Zhang<sup>1</sup>, He Li<sup>1</sup>,  
Jiesheng Huang<sup>1</sup>, Li Wang<sup>1</sup>, Huafang Yuan<sup>1, #</sup>

<sup>1</sup> Department of Ultrasound, Linping Campus, The Second Affiliated Hospital of Zhejiang University School of Medicine, Hangzhou, China.

<sup>2</sup> Department of Ultrasound, The Second Affiliated Hospital of Zhejiang University School of Medicine, Hangzhou, China.

<sup>#</sup> Corresponding author: Huafang Yuan, e-mail: yhf810906@163.com

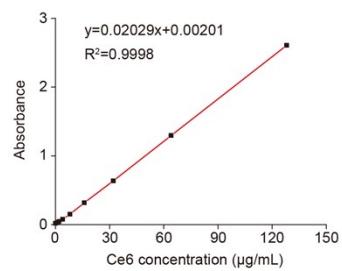

Supplementary figure 1. Standard curve of Ce6 dissolved in DMSO.

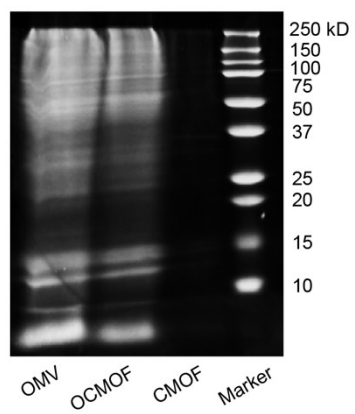

Supplementary figure 2. SDS-PAGE of OMV, OCMOF and CMOF.

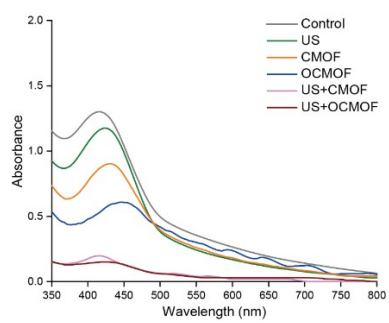

Supplementary figure 3. The absorbance of DPBF treated with different groups.

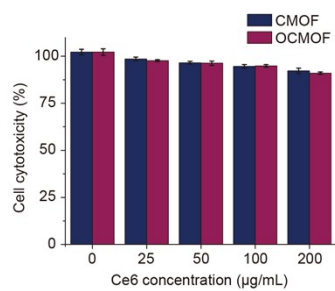

Supplementary figure 4. Cell viability of 293T cells treated with CMOF or OCMOF with different concentration of Ce6.

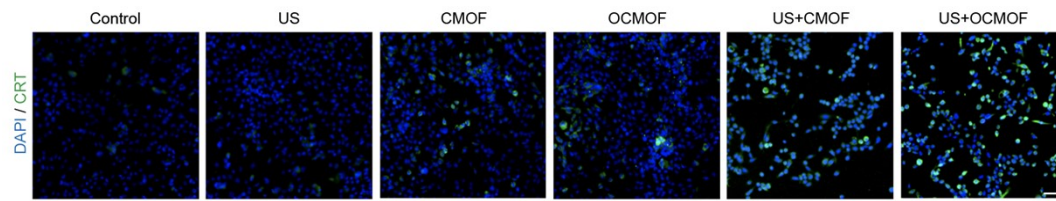

Supplementary figure 5. Fluorescence microscope image of CRT expression in 4T1 cells after different treatment. Bar=200  $\mu$ m.

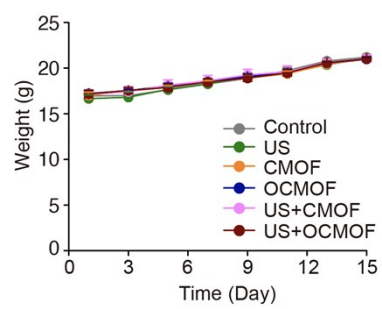

Supplementary figure 6. Body weight of tumor-bearing mice in each treatment group.

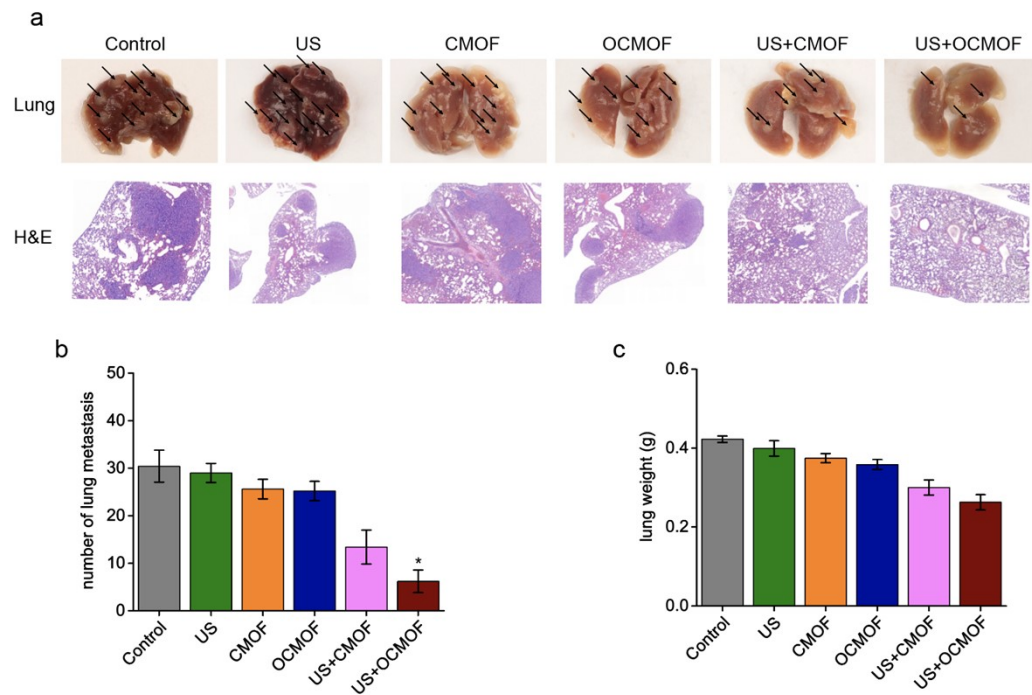

Supplementary figure 7. (a) Photographs and H&E staining (Scale bar = 100  $\mu$ m) of tumor metastasis nodules in lungs of each group. (b-c) Quantification analysis of lung metastasis and lung weight in the each group.

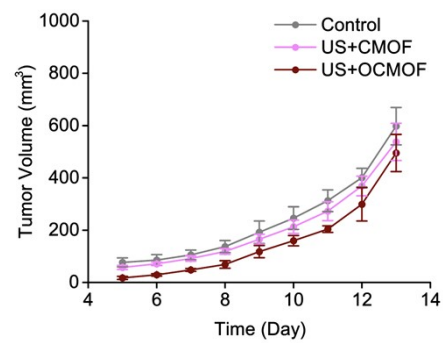

Supplementary figure 8. Tumor volume of rechallenged tumor mice models in each treatment group (n=5).

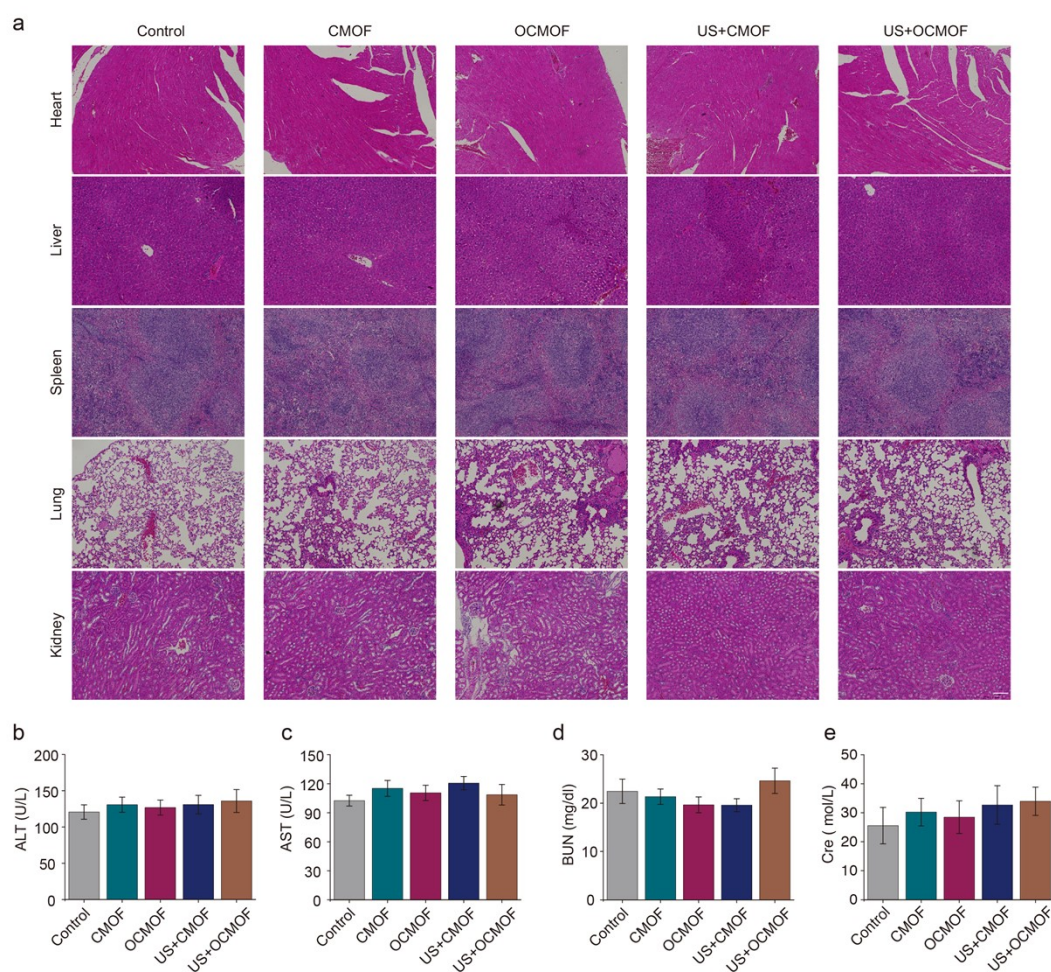

Supplementary figure 9. (a) H&E staining of major organs from tumor-bearing mice after different treatment. (b-c) Biochemical indexes of liver function of tumor-bearing mice after different treatment. (d-e) Biochemical indexes of kidney function of tumor-bearing mice after different treatment.

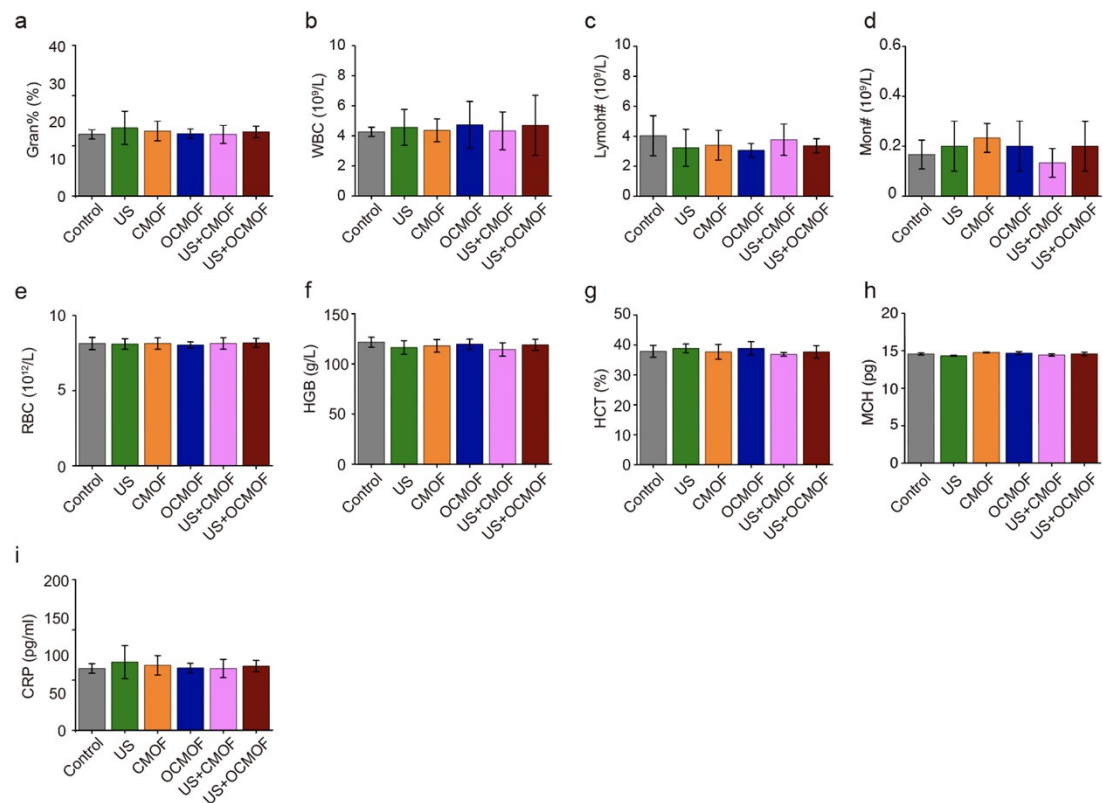

Supplementary figure 10. Blood routine indexes and serum CRP level of mice from different treatment groups.
